# Supplementary material for: Untested assumptions: psychological research and credibility assessment in legal decision-making
Source: PubMed Central journal article supplement (PMC4439408; doi:10.3402/ejpt.v6.27380), 2015-05-19
Supplement: EJPT-6-27380-s003.pdf [file EJPT-6-27380-s003.pdf]

## **Teszteletlen feltevések: pszichológiai kutatás és a hihetőség kérdése jogi döntéshozatal során**

Jane Herlihy & Stuart Turner

Háttér: Traumát túlélő személyek gyakran kerülnek jogi tárgyalások keresztjébe a menekültstátusz igénylése miatt, vagy büntetőeljárás keretein belül.

Módszer és eredmények: Két jogi procedúra kerül megvitatásra és az ezekkel kapcsolatos kutatási eredmények és pszichés folyamatok. Az egyik a menekültek védelemét igénylő folyamat, a másik a szexuális erőszak jelentése és az ezzel kapcsolatos vádemelés.

Következtetések: Széleskörű pszichológiai tudás áll rendelkezésünkre, hogy a téves feltevések és mítoszok elkerülhetők legyenek a döntéshozatali folyamatban. Konkrét javaslatok kerülnek bemutatásra.

Kulcsszavak: PTSD, menekült, menedékhely, szexuális erőszak, döntéshozatal

**Citation:** European Journal of Psychotraumatology 2015, 6: 27380 - <http://dx.doi.org/10.3402/ejpt.v6.27380>
