# Supplementary material for: Untested assumptions: psychological research and credibility assessment in legal decision-making
Source: PubMed Central journal article supplement (PMC4439408; doi:10.3402/ejpt.v6.27380), 2015-05-19
Supplement: EJPT-6-27380-s004.pdf [file EJPT-6-27380-s004.pdf]

## **Supuestos no probados: investigación psicológica y evaluación de la credibilidad en la toma de decisiones legales**

Jane Herlihy & Stuart Turner

**Antecedentes:** Los sobrevivientes del trauma a menudo tienen que negociar en sistemas legales como la determinación del estado de refugiado o el sistema judicial criminal

**Métodos y resultados:** Delineamos y debatimos la contribución que puede hacer la investigación sobre trauma y los procesos psicológicos relacionados en dos campos concretos de la ley donde deben tomarse decisiones legales complejas y difíciles: en las demandas de protección humanitaria y de estado de refugiado y en denunciar y perseguir las agresiones sexuales en el sistema judicial criminal.

**Conclusión:** Existe un amplio conocimiento psicológico que, aplicado correctamente, limitaría la dependencia inapropiada de suposiciones y mitos en la toma de decisiones legales en estos entornos. Se hacen recomendaciones específicas para futuros estudios.

**Palabras clave:** TEPT, refugiado, asilo, violencia sexual, toma de decisiones

**Citation:** European Journal of Psychotraumatology 2015, 6: 27380 - <http://dx.doi.org/10.3402/ejpt.v6.27380>
