# Supplementary material for: Untested assumptions: psychological research and credibility assessment in legal decision-making
Source: PubMed Central journal article supplement (PMC4439408; doi:10.3402/ejpt.v6.27380), 2015-05-19
Supplement: EJPT-6-27380-s006.pdf [file EJPT-6-27380-s006.pdf]

## **Netestirane pretpostavke: psihološko istraživanje i procena kredibiliteta u donošenju odluka iz domena prava**

Jane Herlihy & Stuart Turner

Uvod: Osobe koje su preživjele traumu često moraju da se snalaze u pravnom sistemu, kao što je regulisanje izbegličkog statusa ili sistem krivičnog prava.

Metod & rezultati: Ističemo i naglašavamo udeo psiholoških istraživanja trauma i povezanih psiholoških procesa u dve oblasti prava u kojima se moraju donositi kompleksne i teške pravne odluke: u potraživanjima za izbegličku i humanitarnu zaštitu i u izveštavanju i krivičnom gonjenju seksualnih napada u sistemu krivičnog prava.

Zaključak: Postoji psihološko znanje koje, ako se pravilno primeni, može ograničiti neprimereno oslanjanje na pretpostavke i mitove u pravnom procenjivanju. Prikazane su specifične preporuke za dalja istraživanja.

Ključne reči: PTSP; izbeglice; azil; seksualno nasilje; donošenje odluka

**Citation:** European Journal of Psychotraumatology 2015, 6: 27380 - <http://dx.doi.org/10.3402/ejpt.v6.27380>
